# Supplementary material for: Unravelling the Role of O-glycans in Influenza A Virus Infection
Source: PubMed Central journal article supplement (PMC6219607; doi:10.1038/s41598-018-34175-3), 2018-11-06
Supplement: 41598_2018_34175_MOESM1_ESM.pdf [file 41598_2018_34175_MOESM1_ESM.pdf]

## **Unravelling the Role of O-glycans in Influenza A Virus Infection**

Juliane Mayr<sup>1#</sup>, Kam Lau<sup>1#</sup>, Jimmy C. C. Lai<sup>2</sup>, Ivan A. Gagarinov<sup>1</sup>, Yun Shi<sup>1</sup>, Sarah McAtamney<sup>1</sup>, Renee W. Y. Chan<sup>3</sup>, , John Nicholls<sup>2</sup>, Mark von Itzstein<sup>1\*</sup> and Thomas Haselhorst<sup>1\*</sup>

**Supplementary Information and Figures**

## Supplementary Figures

**A**

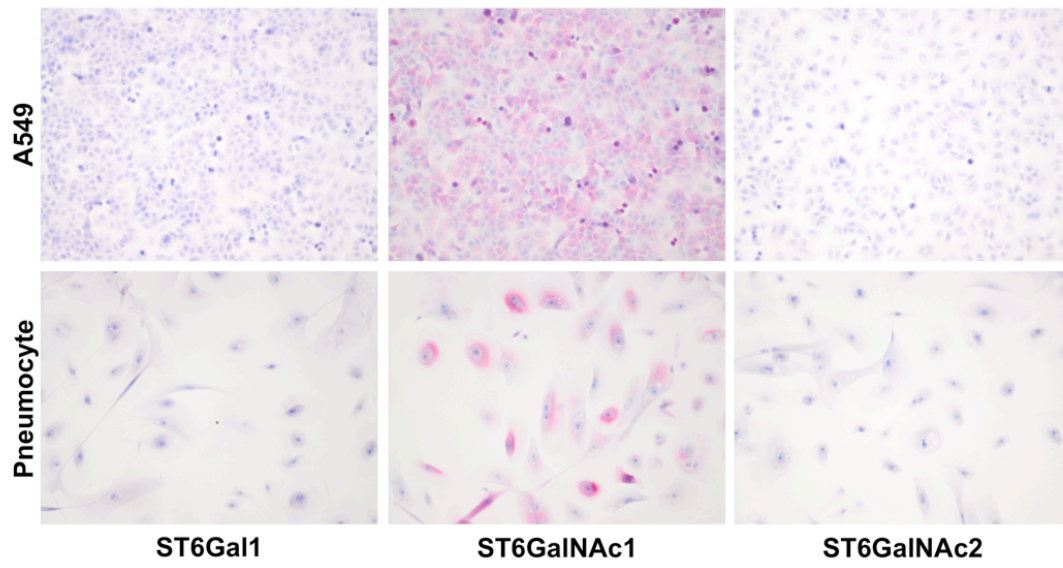

**B**

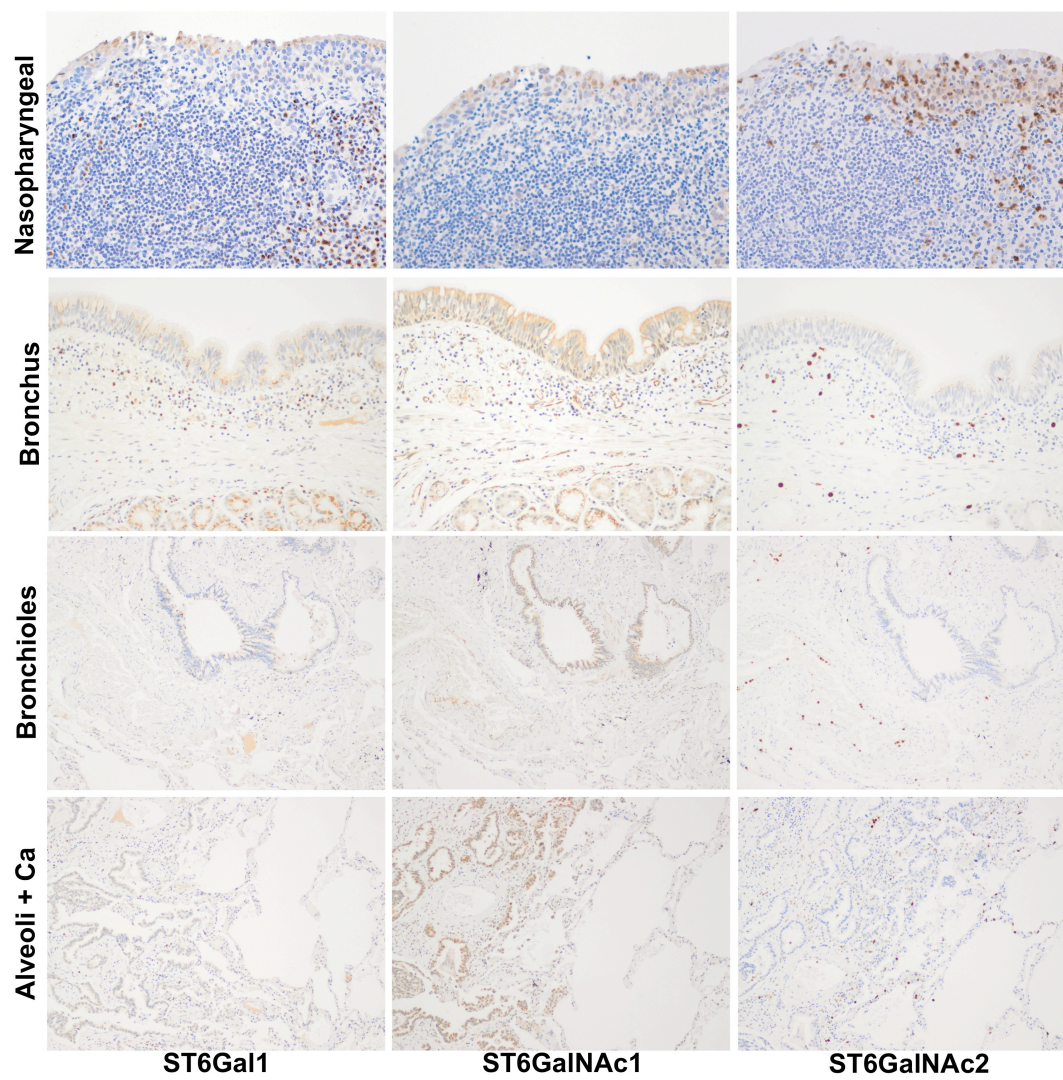

**Supplementary Figure 1: (A)** Immunocytochemistry of A549 and type 1 like pneumocytes. **(B)** immunohistochemistry of normal human nasopharyngeal, bronchus, bronchioles and alveolar epithelium for the expression of ST6Gal1, ST6GalNAc1 and ST6GalNAc2. Positive cells are red **(A)** or brown **(B)** in colour and counterstained with haematoxylin. Magnification of coverslips is 200x and of histological sections is 100x.

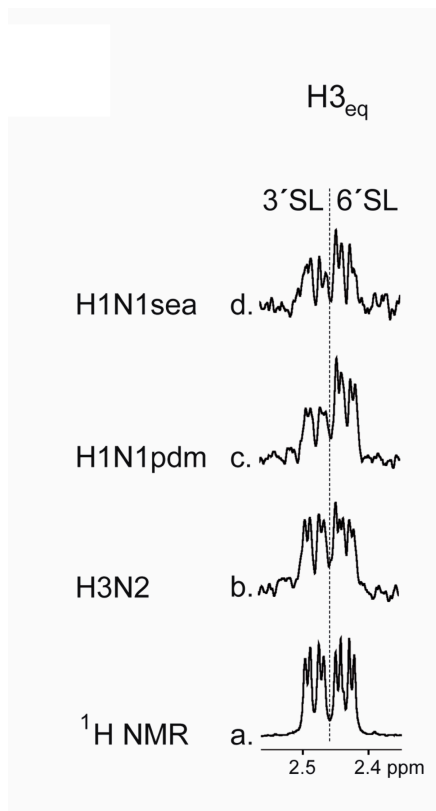

**Supplementary Figure 2:** NMR spectra of influenza A viruses binding to 3'- and 6'-sialyllactose (3'SL and 6'SL).  $^1\text{H}$  NMR spectrum of an equimolar mixture of 3 mM 3'SL and 6'SL (**a**) and STD NMR spectra in the presence of H3N2 (**b**), H1N1pdm (**c**), and H1N1sea (**d**). Only signals of the H3eq of *N*-acetylneuraminic acid are shown.



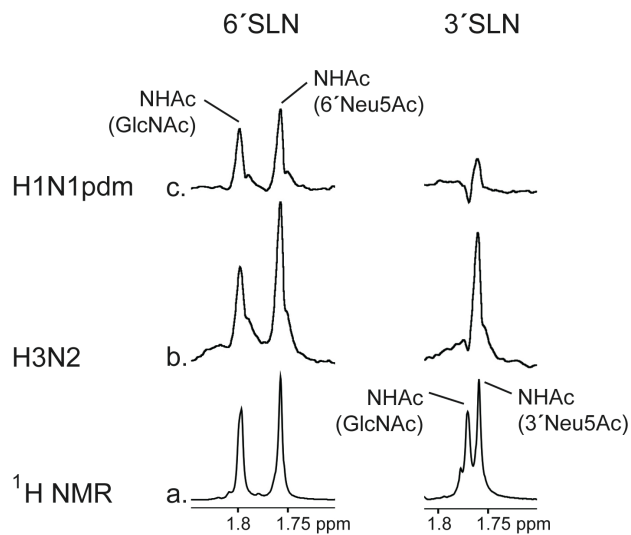

**Supplementary Figure 3:** Influenza A virus binding to 3'SLN and 6'SLN:  $^1\text{H}$  NMR spectra (a) and STD NMR spectra of H3N2 (b) and H1N1pdm (c) influenza virus in the presence of 3 mM 6'SLN and 3'SLN. Strong STD NMR signals could be detected for the methyl protons of the two acetamido groups (Neu5Ac and GlcNAc) of 6'SLN when bound to H1N1pdm (lane c/left). In stark contrast, the STD NMR spectrum obtained with 3'SLN in complex with H1N1pdm revealed only weak interaction without engagement of the acetamido group of the GlcNAc moiety (lane c/right). This is in excellent agreement with the X-ray crystal structure showing that 6'SLN attains a very 'compact' conformation (pdb: 3UBN) and the *N*-acetylneuraminic acid (Neu5Ac), galactose (Gal) and *N*-acetylglucosamine (GlcNAc) make strong contact with the protein surface. H3N2 shows binding to both 3'SLN and 6'SLN with a comparable specificity as already shown for 3'SL and 6'SL (supplementary figure 2b).

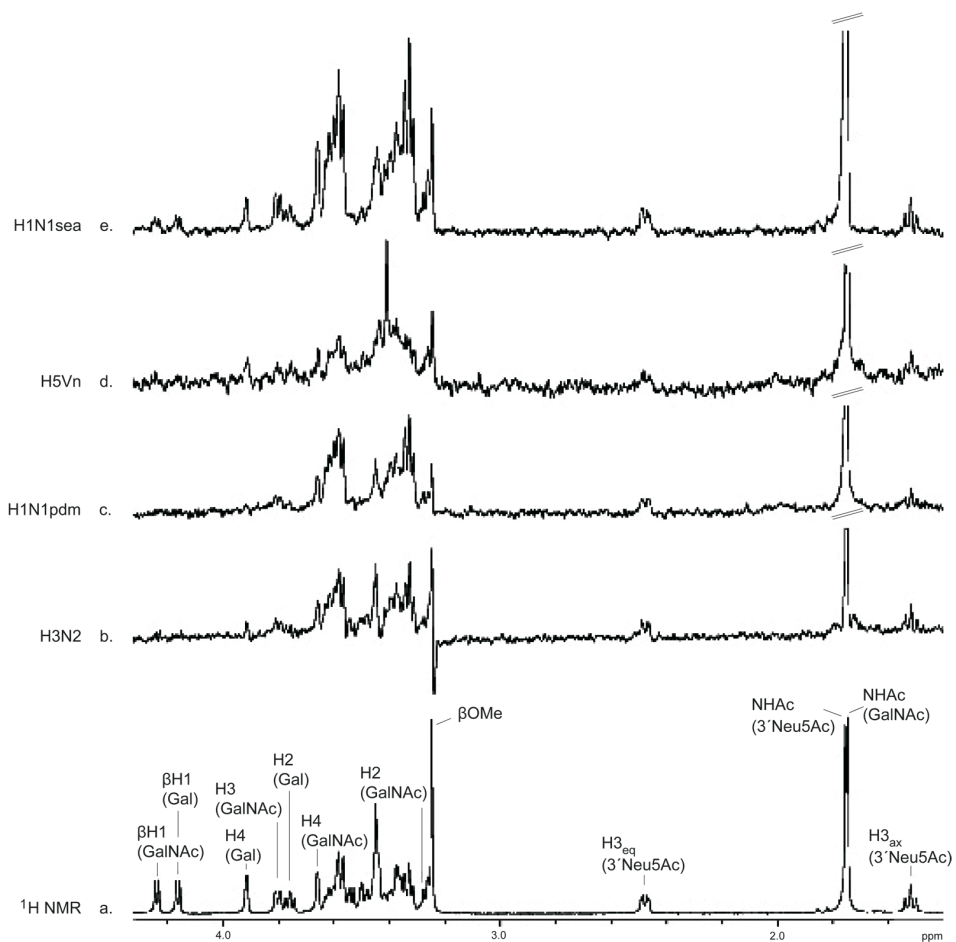

**Supplementary Figure 4:** Influenza A virus binding to 3-sialyl-Gal $\beta$ 1-3GalNAc. <sup>1</sup>H NMR spectra (a) and STD NMR spectra of H3N2 (b), H1N1pdm (c), H5Vn-VLP (d) and H1N1sea (e) influenza virus in the presence of 3 mM 3-sialyl-Gal $\beta$ 1-3GalNAc are shown. The assigned peaks of 3-sialyl-Gal $\beta$ 1-3GalNAc are labeled in the <sup>1</sup>H NMR spectrum (a).

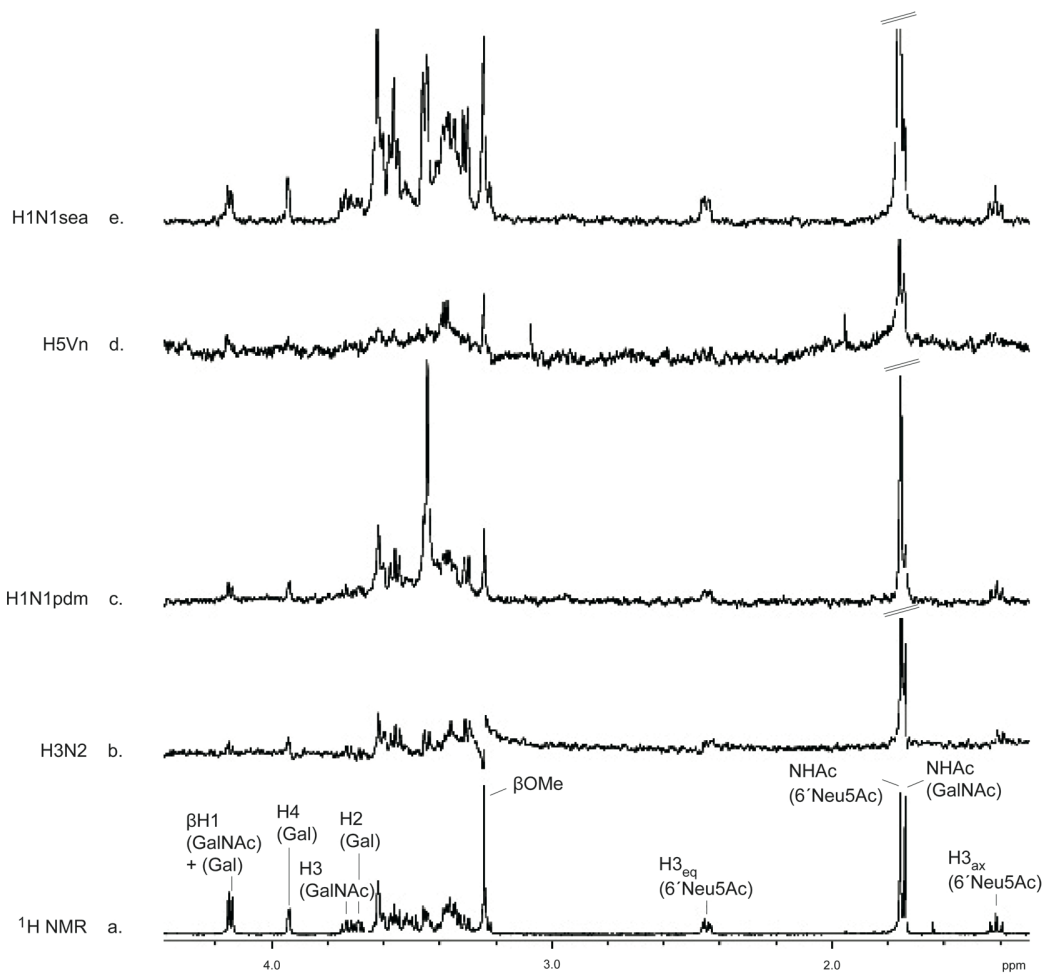

**Supplementary Figure 5:** Influenza A virus binding to 6-sialyl-Gal $\beta$ 1-3GalNAc.  $^1\text{H}$  NMR spectra (a) and STD NMR spectra of H3N2 (b), H1N1pdm (c) H5Vn-VLP (d) and H1N1sea (e) influenza virus in the presence of 3 mM 6-sialyl-Gal $\beta$ 1-3GalNAc are shown. The assigned peaks of 6-sialyl-Gal $\beta$ 1-3GalNAc are labelled in the  $^1\text{H}$  NMR spectrum (a).

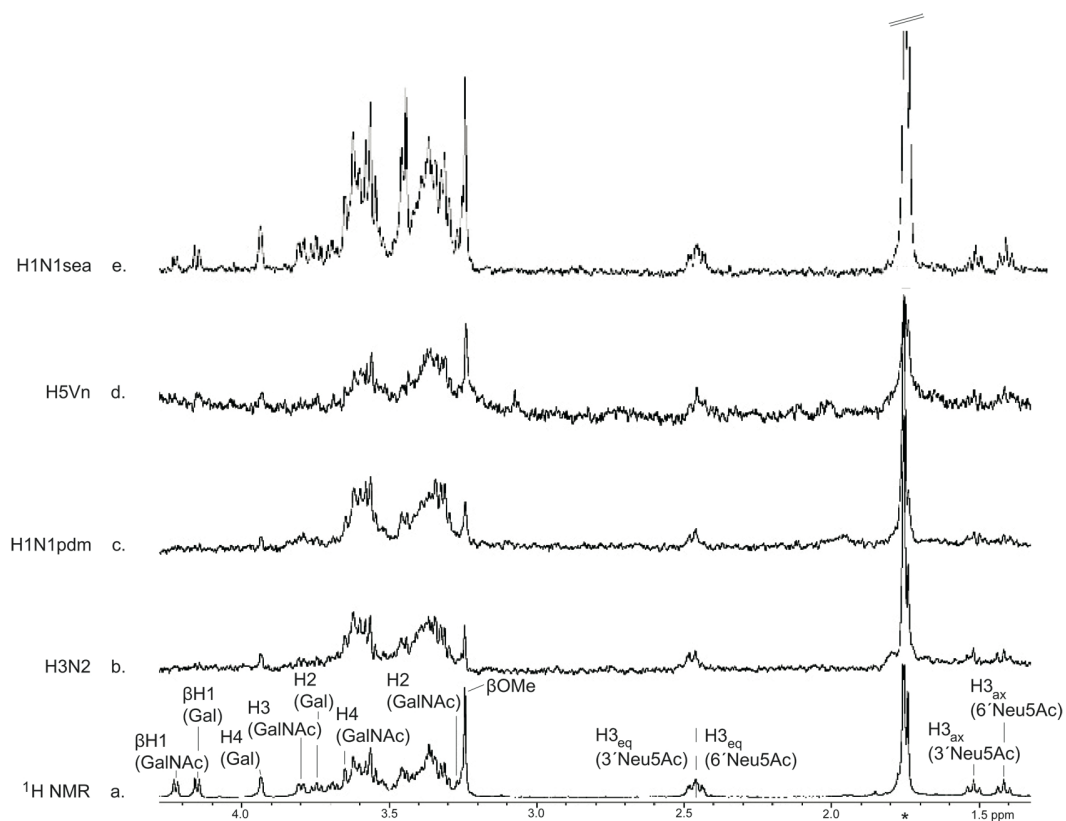

**Supplementary Figure 6:** Influenza A virus binding to 3,6-disialyl-Gal $\beta$ 1-3GalNAc.  $^1\text{H}$  NMR spectra (a) and STD NMR spectra of H3N2 (b), H1N1pdm (c) H5Vn-VLP (d) and H1N1sea (e) influenza virus in the presence of ,6-disialyl-Gal $\beta$ 1-3GalNAc. The assigned peaks of 3,6-disialyl-Gal $\beta$ 1-3GalNAc are labelled in the  $^1\text{H}$  NMR spectrum (a). (\*) For peak assignment of the NHAc peaks please refer to figure 4 in the main publication.

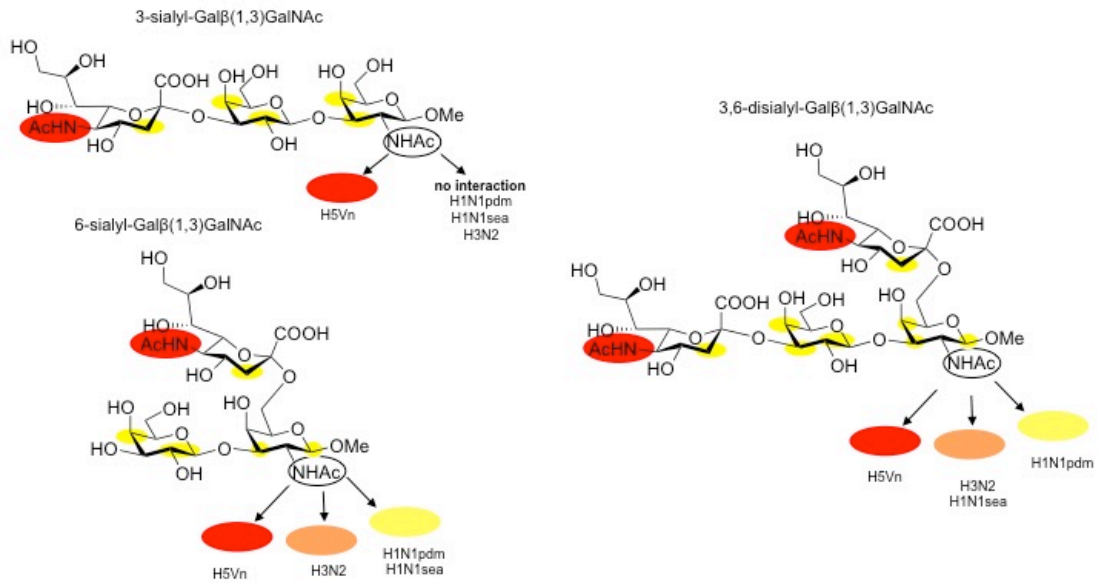

**Supplementary Figure 7:** Proposed binding epitope map of sialylated-Galβ1-3GalNAc. STD NMR signals of all virus strains used in this study were combined (see Supplementary Figures 4 - 6 for individual STD NMR spectra). The following colour coding was used to quantify the STD NMR effects: Strong (red), Medium (orange), Weak (yellow). Weak STD NMR signal intensities (yellow) were detected for the ring protons of Neu5Ac, Gal and GalNAc residues including H3<sub>eq</sub>(Neu5Ac), H3<sub>ax</sub>(Neu5Ac), H1(Gal), H2(Gal), H3(Gal), H4(Gal), H3(GalNAc) and H4(GalNAc). The strongest STD NMR signals (red) were identified for the methyl protons of the acetamido moieties of Neu5Ac and GalNAc.

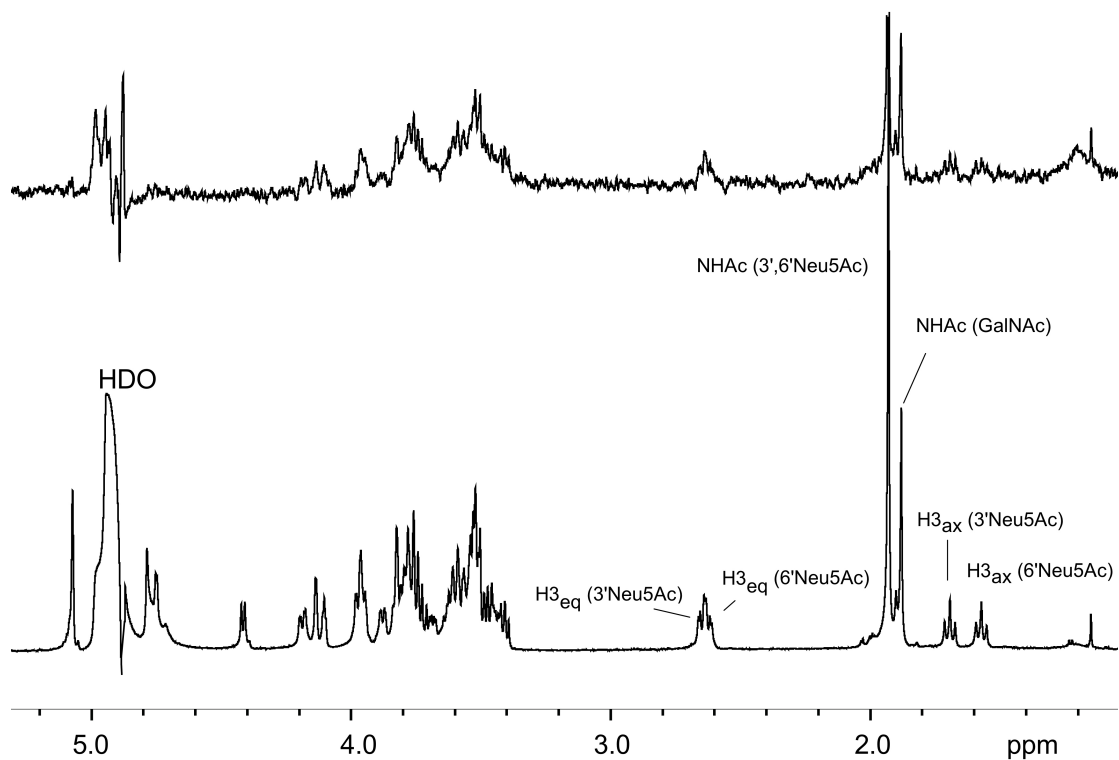

**Supplementary Figure 8:**  $^1\text{H}$  NMR (a) and STD NMR (b) spectra of 3,6-disialyl-Gal $\beta$ 1-3GalNAc-1- $\alpha$ -serine (**6**) in complex with H1N1pdm influenza virus particles.



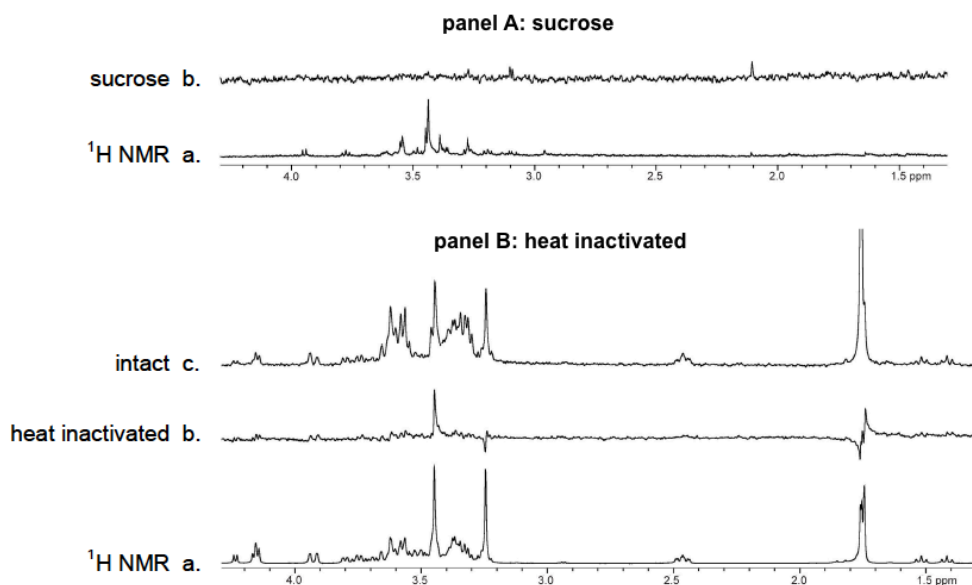

**Supplementary Figure 9:** Series of STD NMR control experiments to confirm the authenticity of the STD signals. **Panel A:** <sup>1</sup>H NMR (a) and STD NMR (b) spectra of an NMR sample containing H1N1pdm in the presence of 3 mM non-binding sugar sucrose. No binding of sucrose could be observed. **Panel B:** <sup>1</sup>H NMR (a) and STD NMR (b) spectra of a heat inactivated H1N1sea virus sample in the presence of an equimolar mixture of 3 mM 3-sialyl and 6-sialyl Gal $\beta$ 1-3GalNAc. Significantly reduced signal intensity and binding could be observed (b) compared to the virus that was intact and not heat inactivated acquired under identical experimental conditions (c). Heat inactivation of H1N1sea was achieved by incubating the virus sample for 20 min at 70 °C.

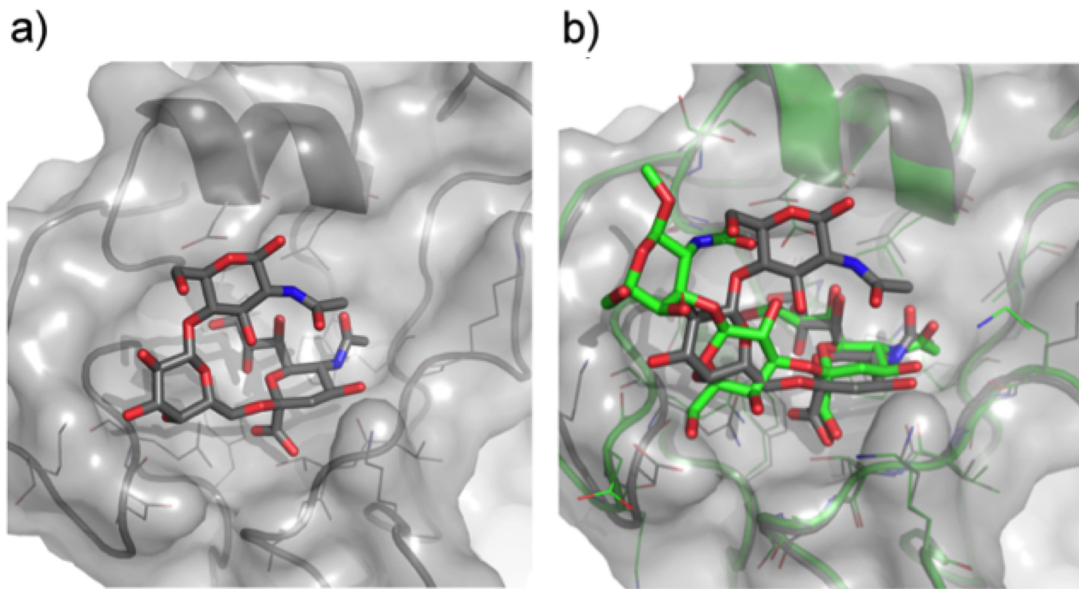

**Supplementary Figure 10:** a) X-Ray crystal structure of H1N1pdm in complex with 6'SLN (PDB: 3UBN) indicates a 'compact' conformation. b) Superimposition of 6'SLN (*N*-glycan, grey) with 3-sialyl-Gal $\beta$ 1-3GalNAc (green) further indicates similar bound conformations of their Neu5Ac and Gal residues.

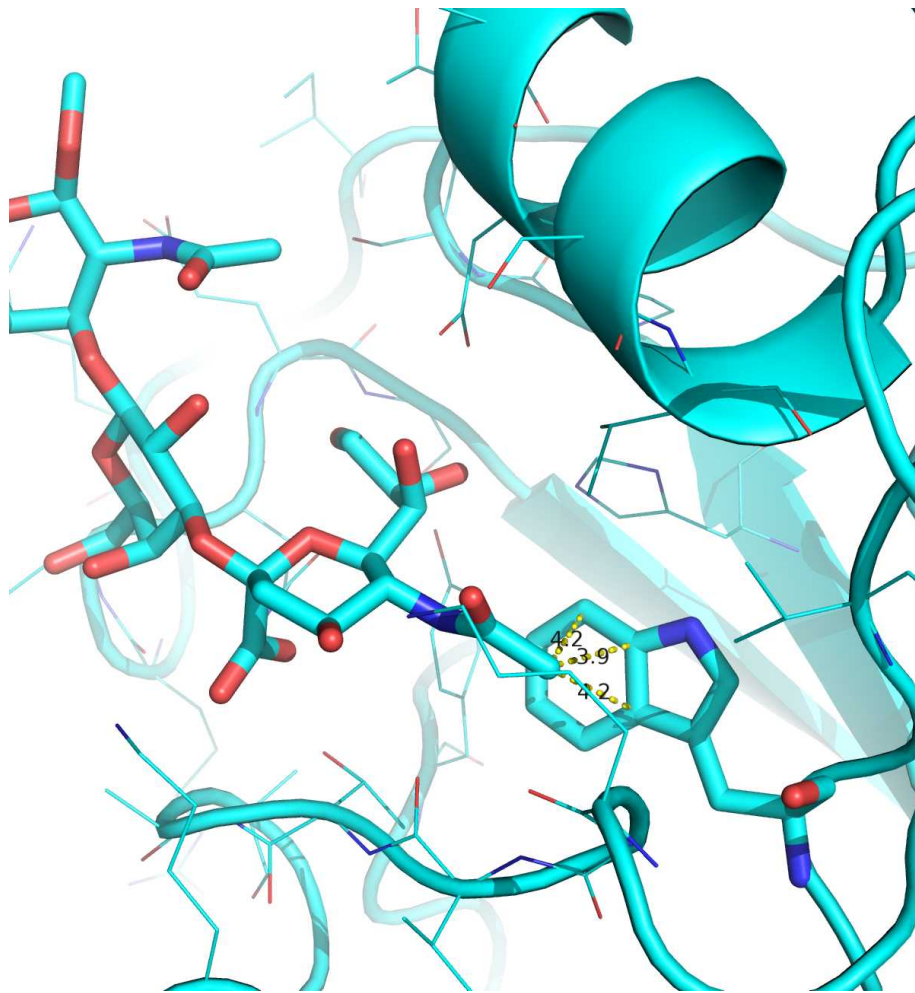

**Supplementary Figure 11:** MD structure of 3-sialyl-Gal $\beta$ 1-3GalNAc bound to H1N1pdm showing the strong hydrophobic interaction of the Neu5Ac residue with Trp-103.

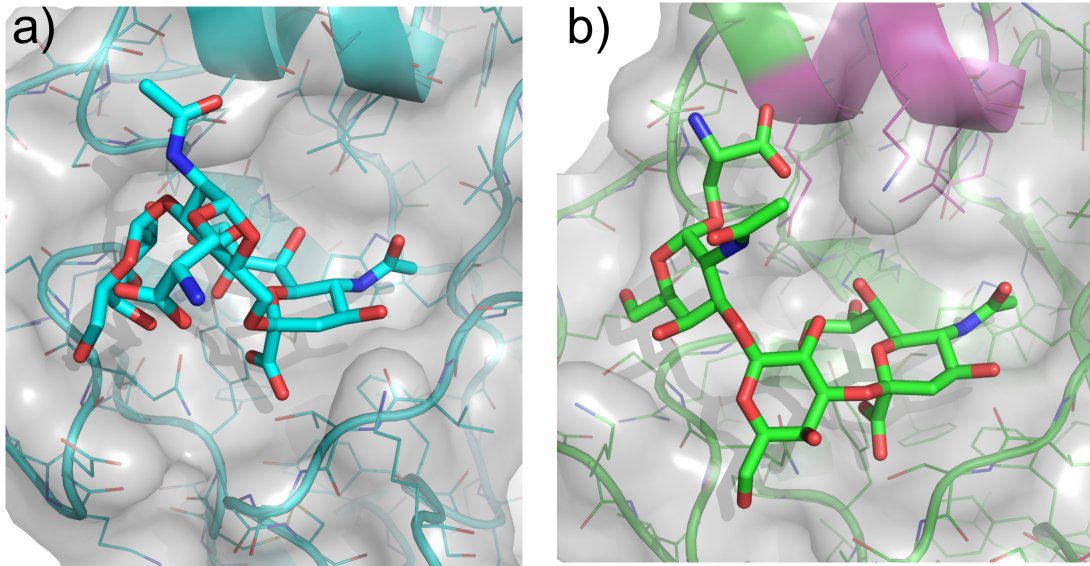

**Supplementary Figure 12:** a) 6-sialyl-Gal $\beta$ 1-3GalNAc-1- $\alpha$ -serine docked into H1N1pdm and b) 3-sialyl-Gal $\beta$ 1-3GalNAc-1- $\alpha$ -serine docked into H5N1. Both structures reveal a similar orientation of the sialylated O-glycan compared to the  $\beta$ -OMe aglycon.

```

H5N1 1 MEKI L FA VSL --KSDQIC GYHANNSTEQVDT ME NVTVTHAQ I E KHNG C
H7N3 1 MNTQILALIALCMLIGAK DKICLGHHAVANGTKVNTLTERG EVVNATETVETANTK IC
H7N7 1 MNTQILVFALVASIPTNADKICLGHHAVSNGTQVNTLTERGVEVVNATETVERTN F IC
H7N9 1 MNTQILVFAL A IPTNADKICLGHHAVSNGTQVNTLTERGVEVVNATETVERTN F IC

H5N1 59 DLLDGV P ILRDCS AGW LGNPMCDFINVPESYIVKANKPVNDLCYPCDFNDYBELK
H7N3 61 -QKRPTDLGQCGLLGLTIGPPQCDQFLFSA-DLIIERRE-GTDVCYPGKFTNEESLR
H7N7 61 S-KGKRTVDLGQCGLLGLTIGPPQCDQFLFSA-DLIIERRE-GSDVCYPGKFTVNEEALR
H7N9 61 S-KGKRTVDLGQCGLLGLTIGPPQCDQFLFSA-DLIIERRE-GSDVCYPGKFTVNEEALR

H5N1 119 HLLSRINHFEKIQIIPKSSWS SHEASLGVSSACPYQGKSSFRNVVWLIK--KNSTYPTI
H7N3 118 QILRSGGGIDKESMG--FTY-SGIRTNGATSACRRSG-SSFYAEMKWLLSNSDNAAFPQM
H7N7 118 QILRESGGIDKETMG--FTY-SGIRTNGATSACRRSG-SSFYAEMKWLLSNTDNAAFPQM
H7N9 118 QILRESGGIDKEAMG--FTY-SGIRTNGATSACRRSG-SSFYAEMKWLLSNTDNAAFPQM

H5N1 177 KRSYNNNTNQEDLVLVWGIHHPNDAAEQTKLYQNPTYIISVGTSTLNQRIVPRIATRSKVN
H7N3 174 TKSYNRNPKNKPALIIVGIVHHSGSATEQTKLYGSGNKLITVGSSKYQSFVPSPGARPQVN
H7N7 174 TKSYNRTRKDPALIIWGIHHSGSTTEQTKLYGSGNKLITVGSSNYQSFVPSPGARPQVN
H7N9 174 TKSYNTRKSPALIVWGIHHSVSTAEQTKLYGSGNKLITVGSSNYQSFVPSPGARPQVN

H5N1 237 GQSGRMEFHWLILKPNDAINFESNCNFIAPFYAYKIVKKG DSTIMKSELEY-GNCKTKCQ
H7N3 234 GQSGRIDFHWLILDPNDTVTTFNNGAFIAPDRASF--FRGHSIGVQSDVPLDSCGEGDCF
H7N7 234 GQSGRIDFHWLILNPNDTVTFSFNNGAFIAPDRASF--LRGKSMGIQSEVQVDANCEGDCY
H7N9 234 GLSGRIDFHWLMLNPNDTVTFSFNNGAFIAPDRASF--LRGKSMGIQSGVQVDANCEGDCY

H5N1 296 TPMCAINSMPFFHNIHPLTIGCEPKYVKSNRLLVATGLRNSPQRERR----RKKRGLFG
H7N3 292 HNGGTIVSLSLFPQINIPRTVKGKPRYVKQTSLLLATGMKNVPEIPKR-----RRRGLFG
H7N7 292 HSGGTIISNLFPQINISRAVKGKPRYVKQESLLLATGMKNVPEIPKR-----RRRGLFG
H7N9 292 HSGGTIISNLFPQINISRAVKGKPRYVKQESLLLATGMKNVPEIPK-----GRLFG

H5N1 351 AIAGFIEGQWGMVDGWYGYHHSNBOGSGYAADKESTQKATDGVTKVNSIIDKMNTOFE
H7N3 352 AIAGFIENGWEGLIDGWYGFRRHQAQEGGTAADYKSTQSAIDQITGKLNRLIDKTNQOFE
H7N7 346 AIAGFIENGWEGLIDGWYGFRRHQAQEGGTAADYKSTQSAIDQITGKLNRLIEKTNQOFE
H7N9 344 AIAGFIENGWEGLIDGWYGFRRHQAQEGGTAADYKSTQSAIDQITGKLNRLIEKTNQOFE

H5N1 411 AVGREFNNEIRRENLNKKMEDGFLDVTYNAELLVLMENERTLDFHDSNVKNLYDKVRL
H7N3 412 LIDNEFSEIEQOIGNVINWTRDSMTEVWSYNAELLVAMENQHTIDLADSEMKNLYERVVK
H7N7 406 LIDNEFTEVEROIGNVINWTRDSMTEVWSYNAELLVAMENQHTIDLADSEMKNLYERVVK
H7N9 404 LIDNEFNEVEKQOIGNVINWTRDSMTEVWSYNAELLVAMENQHTIDLADSEMKNLYERVVK

H5N1 471 QLRDNAKELGNGCFEFYHKCDNECME SVRNGTYDYPOYSFEARLKREEISGVKLESIGIY
H7N3 472 QLRNAEEDGTGCFEIFHKCDQCMESIRNNTYDHTQYRAESLQNRIDQIDPVKLS--GYK
H7N7 466 QLRNAEEDGTGCFEIFHKCDDDCMASIRNNTYDHSKYREEAIQNRIDQIDPVKLS--GYK
H7N9 464 QLRNAEEDGTGCFEIFHKCDDDCMASIRNNTYDHSKYREEAMQNRIDQIDPVKLS--GYK

H5N1 531 QILSIYSTVASSLALAIMVAGLSLWMCNSGSLQCRICI
H7N3 531 DIIWFSGASCFILLAIAMGLVFCIKNGNMRCTICI
H7N7 525 DVILWFSGASCFILLAIAMGLVFCVKNNGNMRCTICI
H7N9 523 DVILWFSGASCFILLAIAMGLVFCVKNNGNMRCTICI

```

**Supplementary Figure 13:** HA sequence alignment of several highly pathogenic avian influenza (HPAI) strains. The two essential amino acid residues for GalNAc binding Lys-193 and Leu-194 (H3 numbering) within the **EQTKLY**-motif (red) are labelled (\*). H5N1 A/Vietnam/1203/2004; H7N3 A/chicken/Jalisco/CPA1/2012; H7N7 A/NL/219/2003; H7N9 A/Anhui/1/2013.

## SYNTHESIS

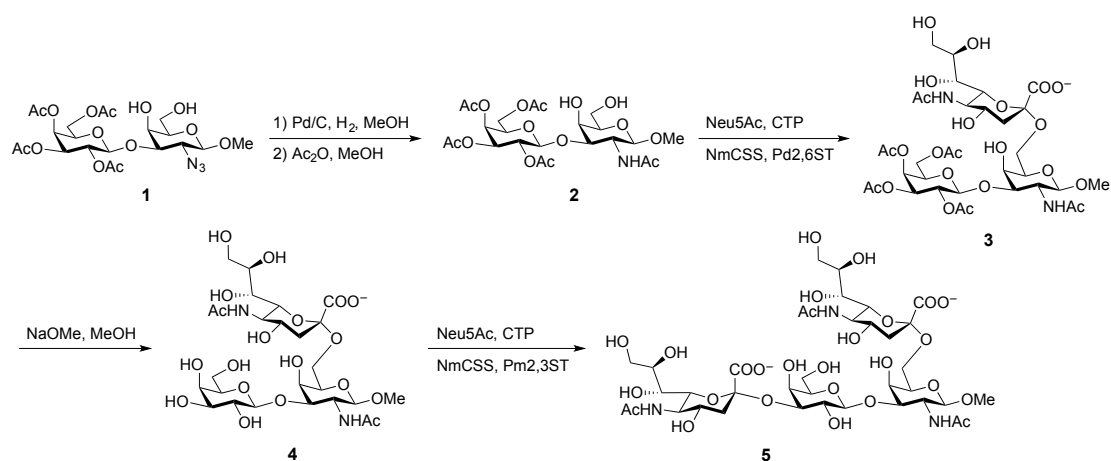

### Methyl (2,3,4,6-tetra-O-acetyl-β-D-galactopyranosyl)-(1→3)-2-acetamido-2-

deoxy-β-D-galactopyranoside (**2**) – Compound **1** was synthesised as describe in the in the literature (1). Compound **1** (1.4 g, 2.55 mmol) was dissolved in methanol (20 mL) and 10% Pd/C (140 mg) was added under the protection of argon. The mixture was hydrogenated placed in a Parr hydrogenator (H<sub>2</sub> 45 psi) and agitated for 1 h at RT. Completion of the reaction was monitored with TLC. The hydrogenation vessel was evacuated and filled with nitrogen, the reaction mixture was filtered, acetic anhydride (1 mL) was added to the filtrate, and the solution was stirred overnight at RT. The solvent was removed under reduced pressure and the crude product was purified by chromatography on silica gel (1:2 to 1:4 hexane-acetone, v/v) to give compound **2** (0.82 g, 57% yield) as a white solid.

<sup>1</sup>H-NMR (300 MHz, D<sub>2</sub>O): δ 5.49 (d, 1 H, *J* = 3 Hz), 5.24 (dd, 1 H, *J* = 10.2 and 3 Hz), 5.14 (dd, 1 H, *J* = 10.2 and 7.8 Hz), 4.95 (d, 1 H, *J* = 8.1 Hz), 4.43 (d, 1 H, *J* = 8.1 Hz), 4.32-4.23 (m, 3 H), 4.14 (d, 1 H, *J* = 3 Hz), 4.02 (dd, 1 H, *J* = 10.5 and 8.4 Hz), 3.92-3.70 (m, 4 H), 3.54 (s, 3 H), 2.28 (s, 3 H), 2.15 (s, 3 H), 2.13 (s, 3 H), 2.05 (s, 3 H), 2.03 (s, 3 H). <sup>13</sup>C-NMR (75 MHz, D<sub>2</sub>O): δ 174.1, 173.4, 173.1, 172.7, 172.6, 102.2, 101.4, 80.1, 74.6, 71.2, 70.6, 69.4, 68.1, 67.7, 61.9, 60.8, 57.0, 50.7, 22.3, 20.3, 20.2, 20.0, 19.9.



**Methyl (2,3,4,6-tetra-O-acetyl-β-D-galactopyranosyl)-(1→3)-[N-acetyl-α-D-neuraminyl-(2→6)]-2-acetamido-2-deoxy-β-D-galactopyranoside (3)** – Compound **2** (124.5 mg, 0.22 mmol), *N*-acetylneuraminic acid (80.4 mg, 0.26 mmol), cytidine-5'-triphosphate disodium salt (139.2 mg, 0.26 mmol) and magnesium chloride hexahydrate (89.3 mg, 0.44 mmol) were dissolved in water (11 mL). The pH was adjusted to pH 7.4-8.0, with phosphate salts at a final concentration of 0.2 M. To this solution were added the two enzymes, *N. meningitidis* CMP-sialic acid synthetase (**2**) (2.21 U) and *P. damsela* α2,6-sialyltransferase (**2**) (4.42 U). The mixture was incubated at 37 °C for 36 h, after which ice cold ethanol (22 mL) was added to quench the reaction. The reaction mixture was then centrifuged at 8000 rpm for 45 min to allow any precipitation. The top clear solution was decanted to a flask, concentrated and subject to gel filtration (Bio-gel P-2, 19mm x 120cm), eluting with water. The crude product from gel filtration was collected and further purified by chromatography on silica gel (2:1:0.1 ethyl acetate-methanol-water, v/v/v) to give compound **3** (101 mg, 52% yield) as a white solid.

<sup>1</sup>H-NMR (600 MHz, D<sub>2</sub>O): δ 5.43 (d, 1 H, *J* = 3.6 Hz), 5.19 (dd, 1 H, *J* = 10.5 and 3.3 Hz), 5.09 (dd, 1 H, *J* = 10.2 and 7.8 Hz), 4.89 (d, 1 H, *J* = 8.4 Hz), 4.37 (d, 1 H, *J* = 9.0 Hz), 4.26-4.19 (m, 3 H), 4.09 (d, 1 H, *J* = 3 Hz), 3.99-3.95 (m, 2 H), 3.87-3.75 (m, 5 H), 3.70-3.56 (m, 5 H), 3.49 (s, 3 H), 2.71 (dd, 1 H, *J* = 12 and 4.8 Hz), 2.20 (s, 3 H), 2.09 (s, 3 H), 2.08 (s, 3 H), 2.02 (s, 3 H), 2.01 (s, 3 H), 1.99 (s, 3 H), 1.67 (app.t, 1 H, *J* = 12 Hz). <sup>13</sup>C-NMR (150 MHz, D<sub>2</sub>O): δ 177.5, 176.7, 176.0, 175.8, 175.7, 175.2, 104.7, 103.7, 103.0, 82.4, 75.6, 75.1, 74.2, 73.8, 73.0, 71.8, 70.7, 70.5, 70.2, 66.2, 65.1, 64.2, 59.7, 54.3, 53.1, 42.7, 24.7, 24.5, 22.8, 22.7, 22.5. HRMS (ESI): *m/z* calculated for C<sub>34</sub>H<sub>51</sub>N<sub>2</sub>O<sub>23</sub><sup>-</sup> (M-Na)<sup>-</sup> 855.2888, found 855.2874.

**Methyl β-D-galactopyranosyl-(1→3)-[N-acetyl-α-D-neuraminyl-(2→6)]-2-acetamido-2-deoxy-β-D-galactopyranoside (4)** – Compound **3** (24 mg, 0.027

mmol) was dissolved in methanol (5 mL) and sodium methoxide (1 M solution in methanol, 0.1 mL) was added. The mixture was stirred for 0.5 h at RT until all starting material was consumed, producing a single product. IR-120 H<sup>+</sup> resin (0.5 g) was added to neutralize the reaction mixture. The reaction mixture was filtered and the filtrate was evaporated to dryness under reduced pressure to give compound **4** as a white solid.

<sup>1</sup>H-NMR (600 MHz, D<sub>2</sub>O): δ 4.41 (d, 1 H, *J* = 8.4 Hz), 4.40 (d, 1 H, *J* = 7.8 Hz), 4.18 (d, 1 H, *J* = 3 Hz), 3.98 (dd, 1 H, *J* = 10.2 and 8.4 Hz), 3.93 (dd, 1 H, *J* = 10.2 and 7.8 Hz), 3.88-3.55 (m, 16 H), 3.49 (s, 3 H), 2.70 (dd, 1 H, *J* = 12.6 and 4.8 Hz), 2.01 (s, 3 H), 1.99 (s, 3 H), 1.66 (app.t, 1 H, *J* = 12.6 Hz). <sup>13</sup>C-NMR (150 MHz, D<sub>2</sub>O): δ 175.0, 174.8, 104.9, 102.2, 100.4, 80.0, 74.9, 73.1, 72.6, 72.5, 71.7, 70.5, 68.5, 68.2, 67.9, 63.3, 62.6, 60.9, 57.1, 51.8, 50.9, 40.2, 22.2, 22.0. HRMS (ESI): *m/z* calculated for C<sub>26</sub>H<sub>43</sub>N<sub>2</sub>O<sub>19</sub><sup>-</sup> (M-Na)<sup>-</sup> 687.2466, found 687.2483.

**Methyl *N*-acetyl- $\alpha$ -D-neuraminyl-(2 $\rightarrow$ 3)- $\beta$ -D-galactopyranosyl-(1 $\rightarrow$ 3)-[*N*-acetyl- $\alpha$ -D-neuraminyl-(2 $\rightarrow$ 6)]-2-acetamido-2-deoxy- $\beta$ -D-galactopyranoside (5)** –

Compound **4** (51.5 mg, 0.073 mmol), *N*-acetylneuraminic acid (26.9 mg, 0.087 mmol), cytidine-5'-triphosphate disodium salt (45.9 mg, 0.087 mmol) and magnesium chloride hexahydrate (29.4 mg, 0.145 mmol) were dissolved in water (5.8 mL). A pH 8.5 Tris-HCl buffer (1 M, 0.73 mL) was then added to bring the pH of the solution to 8.0-8.5. To this solution were added the two enzymes, *N. meningitidis* CMP-sialic acid synthetase (0.73 U) and *P. multocida*  $\alpha$ 2,3-sialyltransferase (3)(0.29 U). The mixture was incubated at 37 °C for 6 h, after which ice cold ethanol (7.3 mL) was added to quench the reaction. The reaction mixture was then centrifuged at 8000 rpm for 45 min to allow any precipitation. The top clear solution was decanted to a flask, concentrated and then subject to gel filtration (Bio-gel P-2, 19mm x 120cm), eluting with water. The crude product from gel filtration was collected and further purified by

chromatography on silica gel (2:1:0.4 ethyl acetate-methanol-water, v/v/v) to give compound **5** (48 mg, 65%) as a white solid. Compound **4** (14 mg, 27%) was also recovered.

<sup>1</sup>H-NMR (600 MHz, D<sub>2</sub>O): δ 4.47 (d, 1 H, *J* = 7.8 Hz), 4.41 (d, 1 H, *J* = 8.4 Hz), 4.17 (d, 1 H, *J* = 3 Hz), 4.04 (dd, 1 H, *J* = 9.6 and 3 Hz), 3.98 (dd, 1 H, *J* = 10.2 and 8.4 Hz), 3.93 (dd, 1 H, *J* = 10.2 and 7.8 Hz), 3.90 (d, 1 H, *J* = 3.6 Hz), 3.87-3.50 (m, 21 H), 3.49 (s, 3 H), 2.73 (dd, 1 H, *J* = 12.6 and 4.8 Hz), 2.70 (dd, 1 H, *J* = 12.6 and 4.8 Hz), 2.01 (s, 3 H), 2.00 (s, 3 H), 1.99 (s, 3 H), 1.76 (app.t, 1 H, *J* = 12.6 Hz), 1.66 (app.t, 1 H, *J* = 12.6 Hz). <sup>13</sup>C-NMR (150 MHz, D<sub>2</sub>O): δ 175.0, 174.9, 174.8, 173.9, 173.4, 104.6, 102.2, 100.4, 99.6, 80.2, 75.5, 74.7, 73.1, 72.7, 72.6, 71.8, 71.7, 68.9, 68.4, 68.2, 68.0, 67.8, 67.3, 63.4, 62.6, 62.4, 60.9, 57.1, 51.8, 50.8, 40.2, 39.6, 22.2, 22.0. HRMS (ESI): *m/z* calculated for C<sub>37</sub>H<sub>60</sub>N<sub>3</sub>O<sub>27</sub><sup>-</sup> (M-2Na+H)<sup>-</sup> 978.3420, found 978.3409.

## Supplementary Information References

1. Paulsen H, Peters S, Bielfeldt T, Meldal M, & Bock K (1995) Synthesis of the Glycosyl Amino-Acids N-Alpha-Fmoc-Ser[Ac-4-Beta-D-Galp-(1-]3)-Ac-2-Alpha-D-Galn(3)P]-Opfp and N-Alpha-Fmoc-Thr[Ac-4-Beta-D-Galp-(1-]3)-Ac-2-Alpha-D-Galn(3)P]-Opfp and the Application in the Solid-Phase Peptide-Synthesis of Multiply Glycosylated Mucin Peptides with T-N and T-Antigenic Structures. *Carbohydrate research* 268(1):17-34.
2. Yu H, *et al.* (2006) Highly efficient chemoenzymatic synthesis of naturally occurring and non-natural alpha-2,6-linked sialosides: A P. damsela alpha-2,6-sialyltransferase with extremely flexible donor-substrate specificity. *Angew Chem Int Edit* 45(24):3938-3944.
3. Yu H, *et al.* (2005) A multifunctional Pasteurella multocida sialyltransferase: A powerful tool for the synthesis of sialoside libraries. *Journal of the American Chemical Society* 127(50):17618-17619.
